# Supplementary material for: Reassessing endothelial-to-mesenchymal transition in mouse bone marrow: insights from lineage tracing models
Source: PubMed Central journal article supplement (PMC10733381; doi:10.1038/s41467-023-44312-w), 2023-12-20
Supplement: 41467_2023_44312_MOESM2_ESM.pdf [file 41467_2023_44312_MOESM2_ESM.pdf]

## Description of Additional Supplementary Files

**File name: Supplementary Data 1**

Description: Cluster annotation in the scRNA-seq of postnatal mouse bone marrow cells.

**File name: Supplementary Data 2**

Description: Cluster identification in the reanalyzed scRNA-seq datasets.

**File name: Supplementary Data 3**

Description: Identification of EC subclusters in the scRNA-seq of postnatal mouse bone marrow cells.
